# Supplementary material
Source: HighWire-hosted journal article supplement (https://erj.ersjournals.com/content/56/3/2002173)
Supplement: inline-supplementary-material-1 [file inline-supplementary-material-1.pdf]

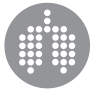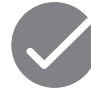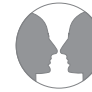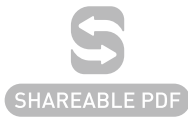

# Rationale and significance of patient selection in awake prone positioning for COVID-19 pneumonia

Ching-Feng Huang <sup>1</sup>, Chee Kiang Tay <sup>2</sup>, Ya-Fang Zhuang<sup>1</sup>, Jiaxuan Liu <sup>2</sup> and Duu Wen Sewa<sup>2</sup>

**Affiliations:** <sup>1</sup>Respiratory Therapy Unit, Singapore General Hospital, Singapore. <sup>2</sup>Dept of Respiratory and Critical Care Medicine, Singapore General Hospital, Singapore.

**Correspondence:** Duu Wen Sewa, Medical Intensive Care Unit, Dept of Respiratory and Critical Care Medicine, Singapore General Hospital, 20 College Road, Academia, Level 3, Singapore 169856. E-mail: sewa.duu.wen@singhealth.com.sg

@ERSpublications

**COVID-19 is increasingly recognised to manifest phenotypic diversity in clinical presentation, severity and trajectory. As such, treatment, e.g. awake prone positioning, should be personalised and guided by the primary pathophysiology and immunopathology.** <https://bit.ly/2ZneHIF>

**Cite this article as:** Huang C-F, Tay CK, Zhuang Y-F, *et al.* Rationale and significance of patient selection in awake prone positioning for COVID-19 pneumonia. *Eur Respir J* 2020; 56: 2002173 [<https://doi.org/10.1183/13993003.02173-2020>].

This single-page version can be shared freely online.

*To the Editors:*

We read with interest the research letter by Ng *et al.* [1], which described their experience in prone positioning (PP) for awake patients with coronavirus disease 2019 (COVID-19) pneumonia, and concluded that this manoeuvre could delay or reduce the need for intensive care. We agree that the authors demonstrated safety and feasibility of PP in COVID-19 pneumonia patients. However, we humbly suggest a few crucial points be addressed before drawing conclusions on the efficacy of PP.
